# Supplementary material for: Multi-Criteria Assessment of the Economic and Environmental Sustainability Characteristics of Intermediate Wheatgrass Grown as a Dual-Purpose Grain and Forage Crop
Source: MDPI journal article supplement (doi:10.3390/su14063548), 2022-03-17
Supplement: s1 [file s1]

Table S1: Enterprise budget for a three-year organic IWG-red clover polyculture in central New York.

|                         | Category                   | Output/Input                           | Units | 2017    | 2018    | 2019    | Total Value |
|-------------------------|----------------------------|----------------------------------------|-------|---------|---------|---------|-------------|
| Revenue                 | Grain                      | Yield                                  | kg/ha | 1124    | 256     | 533     |             |
|                         |                            | Market price                           | \$/kg | 1.23    | 1.17    | 1.11    |             |
|                         |                            | Gross revenue                          | \$/ha | 1384.27 | 299.51  | 592.42  | 2276.21     |
|                         | Straw/Hay                  | Yield                                  | kg/ha | 6441    | 7304    | 8837    |             |
|                         |                            | Market price                           | \$/kg | 0.15    | 0.14    | 0.13    |             |
|                         |                            | Gross revenue                          | \$/ha | 954.34  | 1028.10 | 1181.68 | 3164.12     |
|                         | Annual revenue             |                                        | \$/ha | 2338.61 | 1327.61 | 1816.70 |             |
| Total revenue:          |                            |                                        |       |         |         | 5440.32 | \$/ha       |
| Production Costs        | Field operations           | Moldboard plow                         | \$/ha | 54.36   | -       | -       | 54.36       |
|                         |                            | Disk harrow                            | \$/ha | 42.01   | -       | -       | 42.01       |
|                         |                            | Cultipacker                            | \$/ha | 42.50   | -       | -       | 42.50       |
|                         |                            | Dry fertilizer application             | \$/ha | 17.30   | 16.43   | 15.61   | 49.34       |
|                         |                            | Small grain drill                      | \$/ha | 43.49   | -       | -       | 43.49       |
|                         |                            | Grain harvest (combine & local haul)   | \$/ha | 77.84   | 73.95   | 70.25   | 222.03      |
|                         |                            | Complete hay harvest (mow, bale, haul) | \$/kg | 0.02    | 0.02    | 0.02    |             |
|                         |                            | Hay Yield                              | kg/ha | 6441    | 7304    | 8837    |             |
|                         |                            | Gross cost                             | \$/ha | 125.69  | 135.41  | 155.63  | 416.73      |
|                         | Kernza seed                | Seeding rate                           | kg/ha | 16.8    | -       | -       |             |
|                         |                            | Seed price                             | \$/kg | 13.23   | -       | -       |             |
|                         |                            | Gross cost                             | \$/ha | 222.26  | -       | -       | 222.26      |
|                         | Red clover seed            | Seeding cate                           | kg/ha | 22.4    | 22.4    | -       |             |
|                         |                            | Seed price                             | \$/kg | 7.94    | 7.94    | -       |             |
|                         |                            | Gross cost                             | \$/ha | 177.81  | 168.92  | -       | 346.73      |
|                         | Poultry litter             | Fertilizer rate                        | kg/ha | 1800    | 1800    | 1800    |             |
|                         |                            | Fertilizer price                       | \$/kg | 0.40    | 0.38    | 0.36    |             |
|                         |                            | Gross cost                             | \$/ha | 714.42  | 678.70  | 644.76  | 2037.88     |
|                         | Land                       | Rental cost                            | \$/ha | 150.73  | 147.89  | 147.19  | 445.81      |
|                         | Organic certification      |                                        | \$/ha | 7.41    | 7.04    | 6.69    | 21.15       |
|                         | Annual costs               |                                        | \$/ha | 1675.83 | 1228.34 | 1040.14 |             |
|                         | Production costs subtotal: |                                        |       |         |         |         | 3944.31     |
| Interest                | 5% of production costs     | \$                                     |       |         |         | 197.22  |             |
| Total production costs: |                            |                                        |       |         |         | 4141.52 | \$/ha       |
| Net present value:      |                            |                                        |       |         |         | 1298.80 | \$/ha       |
| Mean annual income:     |                            |                                        |       |         |         | 432.93  | \$/ha       |

Table S2: Enterprise budget for three-year continuous organic IWG monoculture in central New York.

|                            | Category               | Output/Input                           | Units   | 2017    | 2018    | 2019    | Total Value |
|----------------------------|------------------------|----------------------------------------|---------|---------|---------|---------|-------------|
| Revenue                    | Grain                  | Yield                                  | kg/ha   | 1380    | 189     | 385     |             |
|                            |                        | Price                                  | \$/kg   | 1.32    | 1.25    | 1.19    |             |
|                            |                        | Gross Income                           | \$/ha   | 1818.96 | 236.66  | 457.99  | 2513.61     |
|                            | Straw/Hay              | Yield                                  | kg/ha   | 5634    | 4498    | 7465    |             |
|                            |                        | Price                                  | \$/kg   | 0.15    | 0.14    | 0.13    |             |
|                            |                        | Gross Income                           | \$/ha   | 834.77  | 633.13  | 998.22  | 2466.12     |
|                            | Annual revenue         |                                        | \$/ha   | 2653.73 | 869.79  | 1456.21 |             |
| Total revenue:             |                        |                                        |         |         |         | 4979.73 | \$/ha       |
| Production Costs           |                        |                                        |         |         |         |         |             |
| Costs                      | Field operations       | Moldboard plow                         | \$/ha   | 54.36   | -       | -       | 54.36       |
|                            |                        | Disk harrow                            | \$/ha   | 42.01   | -       | -       | 42.01       |
|                            |                        | Cultipacker                            | \$/ha   | 42.50   | -       | -       | 42.50       |
|                            |                        | Dry fertilizer application             | \$/ha   | 17.30   | 16.43   | 15.61   | 49.34       |
|                            |                        | Small grain drill                      | \$/ha   | 43.49   | -       | -       | 43.49       |
|                            |                        | Grain harvest (combine & local haul)   | \$/ha   | 77.84   | 73.95   | 70.25   | 222.03      |
|                            |                        | Complete hay harvest (mow, bale, haul) | \$/kg   | 0.02    | 0.02    | 0.02    |             |
|                            |                        | Hay Yield                              | kg/ha   | 5634    | 4498    | 7465    |             |
|                            |                        | Gross cost                             | \$/ha   | 109.94  | 83.39   | 131.47  | 324.80      |
|                            | Kernza seed            | Seeding rate                           | kg/ha   | 16.8    | -       | -       |             |
|                            |                        | Seed price                             | \$/kg   | 13.23   | -       | -       |             |
|                            |                        | Gross cost                             | \$/ha   | 222.26  | -       | -       | 222.26      |
|                            | Poultry litter         | Fertilizer rate                        | kg/ha   | 1800    | 1800    | 1800    |             |
|                            |                        | Fertilizer price                       | \$/kg   | 0.40    | 0.38    | 0.36    |             |
|                            |                        | Gross cost                             | \$/ha   | 714.42  | 678.70  | 644.76  | 2037.88     |
|                            | Land                   | Rental cost                            | \$/ha   | 150.73  | 147.89  | 147.19  | 445.81      |
|                            | Organic certification  |                                        | \$/ha   | 7.41    | 7.04    | 6.69    | 21.15       |
| Annual costs               |                        | \$/ha                                  | 1482.27 | 1007.40 | 1015.97 |         |             |
| Production costs subtotal: |                        |                                        |         |         |         | 3505.65 | \$/ha       |
| Interest                   | 5% of production costs | \$                                     |         |         |         | 175.28  |             |
| Total production costs:    |                        |                                        |         |         |         | 3680.93 | \$/ha       |
|                            |                        |                                        |         |         |         |         |             |
| Net present value:         |                        |                                        |         |         |         | 1298.80 | \$/ha       |
| Mean annual income:        |                        |                                        |         |         |         | 432.93  | \$/ha       |





Table S5: Enterprise budget for three-year organic corn-soybean-spelt rotation in central New York.

| Category                  |                        | Output/Input                         | Units   | 2017    | 2018    | 2019    | Total Value |
|---------------------------|------------------------|--------------------------------------|---------|---------|---------|---------|-------------|
| Revenue                   | Grain                  |                                      |         | Corn    | Soybean | Spelt   |             |
|                           |                        | Yield                                | kg/ha   | 8278    | 2614    | 2585    |             |
|                           |                        | Market price                         | \$/kg   | 0.28    | 0.70    | 0.24    |             |
|                           | Straw/Hay              | Gross revenue                        | \$/ha   | 2297.07 | 1834.69 | 614.12  | 4745.88     |
|                           |                        | Yield                                | kg/ha   | 0       | 0       | 0       |             |
|                           |                        | Market price                         | \$/kg   | N/a     | N/a     | N/a     |             |
|                           |                        | Gross revenue                        | \$/ha   | 0.00    | 0.00    | 0.00    | 0.00        |
| Annual revenue            |                        | \$/ha                                | 2297.07 | 1834.69 | 614.12  |         |             |
| Total revenue:            |                        |                                      |         |         |         | 4745.88 | \$/ha       |
| Production Costs          |                        |                                      |         |         |         |         |             |
| Costs                     | Field operations       | Moldboard plow                       | \$/ha   | 54.36   | 51.64   | 49.06   | 155.07      |
|                           |                        | Disk harrow                          | \$/ha   | 42.01   | 39.91   | 37.91   | 119.83      |
|                           |                        | Cultipacker                          | \$/ha   | 42.50   | 40.38   | 38.36   | 121.24      |
|                           |                        | Dry fertilizer application           | \$/ha   | 17.30   | 16.43   | 15.61   | 49.34       |
|                           |                        | Planting                             | \$/ha   | 52.39   | 47.42   | 39.25   | 139.06      |
|                           |                        | Interrow cultivation                 | \$/ha   | 139.61  | 83.77   | -       | 223.38      |
|                           |                        | Mowing                               | \$/ha   | -       | 26.76   | 25.42   | 52.18       |
|                           |                        | Grain harvest (combine & local haul) | \$/ha   | 77.84   | 73.95   | 70.25   | 222.03      |
|                           | Grain seed             | Seeding rate                         | kg/ha   | 20.3    | 76.1    | 135     |             |
|                           |                        | Seed price                           | \$/kg   | 7.06    | 2.21    | 1.11    |             |
|                           |                        | Gross cost                           | \$/ha   | 143.24  | 167.80  | 150.44  | 461.48      |
|                           | Clover seed            | Seeding rate                         | kg/ha   | -       | -       | 16.8    |             |
|                           |                        | Seed price                           | \$/kg   | -       | -       | 7.16    |             |
|                           |                        | Gross cost                           | \$/ha   | -       | -       | 120.36  | 120.36      |
|                           | Poultry litter         | Fertilizer rate                      | kg/ha   | 2000    | 0       | 1000    |             |
|                           |                        | Fertilizer price                     | \$/kg   | 0.40    | 0.38    | 0.36    |             |
|                           |                        | Gross cost                           | \$/ha   | 793.80  | 0.00    | 358.20  | 1152.00     |
|                           | Land                   | Rental cost                          | \$/ha   | 150.73  | 147.89  | 147.19  | 445.81      |
|                           | Organic certification  |                                      | \$/ha   | 7.41    | 7.04    | 6.69    | 21.15       |
|                           | Annual costs           |                                      | \$/ha   | 1521.19 | 702.99  | 938.39  |             |
| Production cost subtotal: |                        |                                      |         |         |         | 3282.93 | \$/ha       |
| Interest                  | 5% of production costs | \$                                   |         |         |         | 164.15  |             |
| Total production costs:   |                        |                                      |         |         |         | 3447.08 | \$/ha       |
| Net present value:        |                        |                                      |         |         |         | 1298.80 | \$/ha       |
| Mean annual income:       |                        |                                      |         |         |         | 432.93  | \$/ha       |

Table S6: Estimates of energy consumption and greenhouse gas emissions calculated using the Farm Energy Analysis Tool (Camargo et al., 2013) for a three-year organic IWG-red clover polyculture in central New York.

| <b>Farm inputs and outputs</b>                           |                     |                     |                      |                     |                     |                     |                                              |
|----------------------------------------------------------|---------------------|---------------------|----------------------|---------------------|---------------------|---------------------|----------------------------------------------|
| <b>Crop year</b>                                         | <b>Kernza - Yr1</b> | <b>Kernza - Yr2</b> | <b>Kernza - Yr 3</b> | <b>Clover - Yr1</b> | <b>Clover - Yr2</b> | <b>Clover - Yr3</b> | <b>Total ha<sup>-1</sup> yr<sup>-1</sup></b> |
| Field area (ha yr <sup>-1</sup> )                        | 1.0                 | 1.0                 | 1.0                  | 1.0                 | 1.0                 | 1.0                 | 1.0                                          |
| Yield (Mg ha <sup>-1</sup> )                             | 1.12                | 0.26                | 0.53                 | -                   | -                   | -                   | 0.64                                         |
| Residue removal after harvest (%)                        | 0.90                | 0.90                | 0.90                 | 0.90                | 0.90                | 0.90                | 1.80                                         |
| Crop moisture at harvest (%)                             | 0.214               | 0.131               | 0.164                | -                   | -                   | -                   | 0.170                                        |
| Crop moisture at storage (%)                             | 0.135               | 0.135               | 0.135                | -                   | -                   | -                   | 0.135                                        |
| Poultry litter (kg DM ha <sup>-1</sup> )                 | 1800.0              | 1800.0              | 1800.0               | 0.0                 | 0.0                 | 0.0                 | 1800.0                                       |
| Poultry litter N (kg ha <sup>-1</sup> )                  | 90.0                | 90.0                | 90.0                 | 0.0                 | 0.0                 | 0.0                 | 90.0                                         |
| Poultry litter P (kg ha <sup>-1</sup> )                  | 72.0                | 72.0                | 72.0                 | 0.0                 | 0.0                 | 0.0                 | 72.0                                         |
| Poultry litter K (kg ha <sup>-1</sup> )                  | 54.0                | 54.0                | 54.0                 | 0.0                 | 0.0                 | 0.0                 | 54.0                                         |
| Seed rate (kg ha <sup>-1</sup> )                         | 16.8                | 0.0                 | 0.0                  | 22.4                | 22.4                | 0.0                 | 20.5                                         |
| Diesel fuel (L ha <sup>-1</sup> )                        | 82.7                | 44.7                | 43.3                 | 0.0                 | 0.0                 | 0.0                 | 56.9                                         |
| Drying (MJ yr <sup>-1</sup> )                            | 322.9               | 0.0                 | 55.1                 | -                   | -                   | -                   | 126.0                                        |
| Labor (hr ha <sup>-1</sup> )                             | 2.2                 | 1.1                 | 1.0                  | 0.0                 | 0.0                 | 0.0                 | 1.4                                          |
| Crop production (Mg WM yr <sup>-1</sup> )                | 1.12                | 0.26                | 0.53                 | -                   | -                   | -                   | 0.64                                         |
| Crop production (Mg DM yr <sup>-1</sup> )                | 0.97                | 0.22                | 0.46                 | -                   | -                   | -                   | 0.55                                         |
| Residue harvested (Mg DM yr <sup>-1</sup> )              | 5.6                 | 4.3                 | 8.4                  | 0.8                 | 3.0                 | 0.4                 | 7.5                                          |
| Total crop biomass                                       | 6.6                 | 4.5                 | 8.9                  | 0.8                 | 3.0                 | 0.4                 | 8.1                                          |
| <b>Energy analysis</b>                                   |                     |                     |                      |                     |                     |                     | <b>MJ ha<sup>-1</sup> yr<sup>-1</sup></b>    |
| Poultry litter transport                                 | 237.5               | 237.5               | 237.5                | 0.0                 | 0.0                 | 0.0                 | 237.5                                        |
| Poultry litter production                                | 2697.4              | 2697.4              | 2697.4               | 0.0                 | 0.0                 | 0.0                 | 2697.4                                       |
| Seed                                                     | 1478.4              | 0.0                 | 0.0                  | 929.4               | 929.4               | 0.0                 | 1112.4                                       |
| Transportation of inputs                                 | 10.8                | 0.0                 | 0.0                  | 14.3                | 14.3                | 0.0                 | 13.1                                         |
| Equipment                                                | 160.7               | 84.6                | 82.9                 | 0.0                 | 0.0                 | 0.0                 | 109.4                                        |
| Drying                                                   | 322.9               | 0.0                 | 55.1                 | 0.0                 | 0.0                 | 0.0                 | 126.0                                        |
| Labor                                                    | 64.8                | 32.3                | 30.7                 | 0.0                 | 0.0                 | 0.0                 | 42.6                                         |
| Diesel fuel                                              | 3709.2              | 2004.9              | 1942.0               | 0.0                 | 0.0                 | 0.0                 | 2552.0                                       |
| <b>Total energy (MJ ha<sup>-1</sup> yr<sup>-1</sup>)</b> | <b>8681.7</b>       | <b>5056.6</b>       | <b>5045.7</b>        | <b>943.7</b>        | <b>943.7</b>        | <b>0.0</b>          | <b>6890.5</b>                                |

| Greenhouse gas emissions analysis                                     |               |              |              |             |             | kg CO <sub>2</sub> e ha <sup>-1</sup> yr <sup>-1</sup> |              |
|-----------------------------------------------------------------------|---------------|--------------|--------------|-------------|-------------|--------------------------------------------------------|--------------|
| Poultry litter transport                                              | 20.3          | 20.3         | 20.3         | 0.0         | 0.0         | 0.0                                                    | 20.3         |
| Poultry litter production                                             | 111.3         | 111.3        | 111.3        | 0.0         | 0.0         | 0.0                                                    | 111.3        |
| Seed                                                                  | 29.0          | 0.0          | 0.0          | 46.5        | 46.5        | 0.0                                                    | 40.7         |
| Transportation of inputs                                              | 0.8           | 0.0          | 0.0          | 1.1         | 1.1         | 0.0                                                    | 1.0          |
| Equipment                                                             | 10.4          | 5.5          | 5.4          | 0.0         | 0.0         | 0.0                                                    | 7.1          |
| Drying                                                                | 25.8          | 0.0          | 4.4          | 0.0         | 0.0         | 0.0                                                    | 10.1         |
| Diesel fuel                                                           | 266.6         | 144.1        | 139.6        | 0.0         | 0.0         | 0.0                                                    | 183.4        |
| N <sub>2</sub> O - manure application                                 | 600.6         | 600.6        | 600.6        | 0.0         | 0.0         | 0.0                                                    | 600.6        |
| N <sub>2</sub> O - aboveground crop residues, direct                  | 2.0           | 0.5          | 1.0          | 0.0         | 0.0         | 0.0                                                    | 1.2          |
| N <sub>2</sub> O - belowground crop residues, direct                  | 30.4          | 6.9          | 14.4         | 0.0         | 0.0         | 0.0                                                    | 17.2         |
| N <sub>2</sub> O - aboveground crop residues, indirect                | 0.5           | 0.1          | 0.2          | 0.0         | 0.0         | 0.0                                                    | 0.3          |
| N <sub>2</sub> O - belowground crop residues, indirect                | 6.8           | 1.6          | 3.2          | 0.0         | 0.0         | 0.0                                                    | 3.9          |
| N <sub>2</sub> O - total from crop residue                            | 39.7          | 9.1          | 18.9         | 0.0         | 0.0         | 0.0                                                    | 22.6         |
| <b>Total GHG (kg CO<sub>2</sub>e ha<sup>-1</sup> yr<sup>-1</sup>)</b> | <b>1104.6</b> | <b>890.8</b> | <b>900.4</b> | <b>47.6</b> | <b>47.6</b> | <b>0.0</b>                                             | <b>997.0</b> |

Table S7: Estimates of energy consumption and greenhouse gas emissions calculated using the Farm Energy Analysis Tool (Camargo et al., 2013) for a three-year continuous organic IWG monoculture in central New York.

| <b>Farm inputs and outputs</b>                           |                     |                     |                      |            |            |            |                                              |
|----------------------------------------------------------|---------------------|---------------------|----------------------|------------|------------|------------|----------------------------------------------|
| <b>Crop year</b>                                         | <b>Kernza - Yr1</b> | <b>Kernza - Yr2</b> | <b>Kernza - Yr 3</b> | <b>-</b>   | <b>-</b>   | <b>-</b>   | <b>Total ha<sup>-1</sup> yr<sup>-1</sup></b> |
| Field area (ha yr <sup>-1</sup> )                        | 1.0                 | 1.0                 | 1.0                  | 0.0        | 0.0        | 0.0        | 1.0                                          |
| Yield (Mg ha <sup>-1</sup> )                             | 1.38                | 0.19                | 0.38                 | -          | -          | -          | 0.65                                         |
| Residue removal after harvest (%)                        | 0.90                | 0.90                | 0.90                 | 0.90       | 0.90       | 0.90       | 1.80                                         |
| Crop moisture at harvest (%)                             | 0.197               | 0.135               | 0.188                | -          | -          | -          | 0.173                                        |
| Crop moisture at storage (%)                             | 0.135               | 0.135               | 0.135                | -          | -          | -          | 0.135                                        |
| Poultry litter (kg DM ha <sup>-1</sup> )                 | 1800.0              | 1800.0              | 1800.0               | 0.0        | 0.0        | 0.0        | 1800.0                                       |
| Poultry litter N (kg ha <sup>-1</sup> )                  | 90.0                | 90.0                | 90.0                 | 0.0        | 0.0        | 0.0        | 90.0                                         |
| Poultry litter P (kg ha <sup>-1</sup> )                  | 72.0                | 72.0                | 72.0                 | 0.0        | 0.0        | 0.0        | 72.0                                         |
| Poultry litter K (kg ha <sup>-1</sup> )                  | 54.0                | 54.0                | 54.0                 | 0.0        | 0.0        | 0.0        | 54.0                                         |
| Seed rate (kg ha <sup>-1</sup> )                         | 16.8                | 0.0                 | 0.0                  | 0.0        | 0.0        | 0.0        | 5.6                                          |
| Diesel fuel (L ha <sup>-1</sup> )                        | 81.3                | 43.3                | 43.3                 | 0.0        | 0.0        | 0.0        | 56.0                                         |
| Drying (MJ yr <sup>-1</sup> )                            | 311.4               | 0.0                 | 74.3                 | -          | -          | -          | 128.6                                        |
| Labor (hr ha <sup>-1</sup> )                             | 2.1                 | 1.0                 | 1.0                  | 0.0        | 0.0        | 0.0        | 1.4                                          |
| Crop production (Mg WM yr <sup>-1</sup> )                | 1.38                | 0.19                | 0.38                 | -          | -          | -          | 0.65                                         |
| Crop production (Mg DM yr <sup>-1</sup> )                | 1.19                | 0.16                | 0.33                 | -          | -          | -          | 0.56                                         |
| Residue harvested (Mg DM yr <sup>-1</sup> )              | 5.6                 | 3.9                 | 7.4                  | 0.0        | 0.0        | 0.0        | 5.7                                          |
| Total crop biomass                                       | 6.8                 | 4.1                 | 7.8                  | 0.0        | 0.0        | 0.0        | 6.2                                          |
| <b>Energy analysis</b>                                   |                     |                     |                      |            |            |            | <b>MJ ha<sup>-1</sup> yr<sup>-1</sup></b>    |
| Poultry litter transport                                 | 237.5               | 237.5               | 237.5                | 0.0        | 0.0        | 0.0        | 237.5                                        |
| Poultry litter production                                | 2697.4              | 2697.4              | 2697.4               | 0.0        | 0.0        | 0.0        | 2697.4                                       |
| Seed                                                     | 1478.4              | 0.0                 | 0.0                  | 0.0        | 0.0        | 0.0        | 492.8                                        |
| Transportation of inputs                                 | 10.8                | 0.0                 | 0.0                  | 0.0        | 0.0        | 0.0        | 3.6                                          |
| Equipment                                                | 159.1               | 82.9                | 82.9                 |            |            |            | 108.3                                        |
| Drying                                                   | 311.4               | 0.0                 | 74.3                 | 0.0        | 0.0        | 0.0        | 128.6                                        |
| Labor                                                    | 63.3                | 30.7                | 30.7                 | 0.0        | 0.0        | 0.0        | 41.5                                         |
| Diesel fuel                                              | 3646.3              | 1942.0              | 1942.0               | 0.0        | 0.0        | 0.0        | 2510.1                                       |
| <b>Total energy (MJ ha<sup>-1</sup> yr<sup>-1</sup>)</b> | <b>8604.1</b>       | <b>4990.6</b>       | <b>5064.9</b>        | <b>0.0</b> | <b>0.0</b> | <b>0.0</b> | <b>6219.9</b>                                |



| Greenhouse gas emissions analysis                                     |               |              |              |            |            | kg CO <sub>2</sub> e ha <sup>-1</sup> yr <sup>-1</sup> |              |
|-----------------------------------------------------------------------|---------------|--------------|--------------|------------|------------|--------------------------------------------------------|--------------|
| Poultry litter transport                                              | 20.3          | 20.3         | 20.3         | 0.0        | 0.0        | 0.0                                                    | 20.3         |
| Poultry litter production                                             | 111.3         | 111.3        | 111.3        | 0.0        | 0.0        | 0.0                                                    | 111.3        |
| Seed                                                                  | 29.0          | 0.0          | 0.0          | 0.0        | 0.0        | 0.0                                                    | 9.7          |
| Transportation of inputs                                              | 0.8           | 0.0          | 0.0          | 0.0        | 0.0        | 0.0                                                    | 0.3          |
| Equipment                                                             | 10.3          | 5.4          | 5.4          | 0.0        | 0.0        | 0.0                                                    | 7.0          |
| Drying                                                                | 24.9          | 0.0          | 5.9          | 0.0        | 0.0        | 0.0                                                    | 10.3         |
| Diesel fuel                                                           | 262.1         | 139.6        | 139.6        | 0.0        | 0.0        | 0.0                                                    | 180.4        |
| N <sub>2</sub> O - manure application                                 | 600.6         | 600.6        | 600.6        | 0.0        | 0.0        | 0.0                                                    | 600.6        |
| N <sub>2</sub> O - aboveground crop residues, direct                  | 2.5           | 0.3          | 0.7          | 0.0        | 0.0        | 0.0                                                    | 1.2          |
| N <sub>2</sub> O - belowground crop residues, direct                  | 37.3          | 5.1          | 10.4         | 0.0        | 0.0        | 0.0                                                    | 17.6         |
| N <sub>2</sub> O - aboveground crop residues, indirect                | 0.6           | 0.1          | 0.2          | 0.0        | 0.0        | 0.0                                                    | 0.3          |
| N <sub>2</sub> O - belowground crop residues, indirect                | 8.4           | 1.2          | 2.3          | 0.0        | 0.0        | 0.0                                                    | 4.0          |
| N <sub>2</sub> O - total from crop residue                            | 48.8          | 6.7          | 13.6         | 0.0        | 0.0        | 0.0                                                    | 23.0         |
| <b>Total GHG (kg CO<sub>2</sub>e ha<sup>-1</sup> yr<sup>-1</sup>)</b> | <b>1108.1</b> | <b>883.8</b> | <b>896.7</b> | <b>0.0</b> | <b>0.0</b> | <b>0.0</b>                                             | <b>962.9</b> |

Table S8: Estimates of energy consumption and greenhouse gas emissions calculated using the Farm Energy Analysis Tool (Camargo et al., 2013) for a three-year continuous organic hard red winter wheat-red clover polyculture in central New York.

| <b>Farm inputs and outputs</b>                           |                    |                    |                     |                     |                     |                     |                                              |
|----------------------------------------------------------|--------------------|--------------------|---------------------|---------------------|---------------------|---------------------|----------------------------------------------|
| <b>Crop year</b>                                         | <b>Wheat - Yr1</b> | <b>Wheat - Yr2</b> | <b>Wheat - Yr 3</b> | <b>Clover - Yr1</b> | <b>Clover - Yr2</b> | <b>Clover - Yr3</b> | <b>Total ha<sup>-1</sup> yr<sup>-1</sup></b> |
| Field area (ha yr <sup>-1</sup> )                        | 1.0                | 1.0                | 1.0                 | 1.0                 | 1.0                 | 1.0                 | 1.0                                          |
| Yield (Mg ha <sup>-1</sup> )                             | 3.3                | 3.3                | 2.8                 | -                   | -                   | -                   | 3.1                                          |
| Residue removal after harvest (%)                        | 0.90               | 0.90               | 0.90                | 0.90                | 0.90                | 0.90                | 1.80                                         |
| Crop moisture at harvest (%)                             | 0.037              | 0.081              | 0.161               | -                   | -                   | -                   | 0.093                                        |
| Crop moisture at storage (%)                             | 0.135              | 0.135              | 0.135               | -                   | -                   | -                   | 0.135                                        |
| Poultry litter (kg DM ha <sup>-1</sup> )                 | 1800.0             | 1800.0             | 1800.0              | 0.0                 | 0.0                 | 0.0                 | 1800.0                                       |
| Poultry litter N (kg ha <sup>-1</sup> )                  | 90.0               | 90.0               | 90.0                | 0.0                 | 0.0                 | 0.0                 | 90.0                                         |
| Poultry litter P (kg ha <sup>-1</sup> )                  | 72.0               | 72.0               | 72.0                | 0.0                 | 0.0                 | 0.0                 | 72.0                                         |
| Poultry litter K (kg ha <sup>-1</sup> )                  | 54.0               | 54.0               | 54.0                | 0.0                 | 0.0                 | 0.0                 | 54.0                                         |
| Seed rate (kg ha <sup>-1</sup> )                         | 107.6              | 107.6              | 107.6               | 22.4                | 22.4                | 22.4                | 130.0                                        |
| Diesel fuel (L ha <sup>-1</sup> )                        | 63.7               | 63.7               | 63.7                | 0.0                 | 0.0                 | 0.0                 | 63.7                                         |
| Drying (MJ yr <sup>-1</sup> )                            | 0.0                | 0.0                | 261.9               | -                   | -                   | -                   | 87.3                                         |
| Labor (hr ha <sup>-1</sup> )                             | 2.1                | 2.1                | 2.1                 | 0.0                 | 0.0                 | 0.0                 | 2.1                                          |
| Crop production (Mg WM yr <sup>-1</sup> )                | 3.3                | 3.3                | 2.8                 | -                   | -                   | -                   | 3.1                                          |
| Crop production (Mg DM yr <sup>-1</sup> )                | 2.9                | 2.9                | 2.4                 | -                   | -                   | -                   | 2.7                                          |
| Residue harvested (Mg DM yr <sup>-1</sup> )              | 4.9                | 3.5                | 3.7                 | 0.5                 | 0.2                 | 0.6                 | 4.4                                          |
| Total crop biomass                                       | 7.7                | 6.3                | 6.1                 | 0.5                 | 0.2                 | 0.6                 | 7.1                                          |
| <b>Energy analysis</b>                                   |                    |                    |                     |                     |                     |                     | <b>MJ ha<sup>-1</sup> yr<sup>-1</sup></b>    |
| Poultry litter transport                                 | 237.5              | 237.5              | 237.5               | 0.0                 | 0.0                 | 0.0                 | 237.5                                        |
| Poultry litter production                                | 2697.4             | 2697.4             | 2697.4              | 0.0                 | 0.0                 | 0.0                 | 2697.4                                       |
| Seed                                                     | 930.2              | 930.2              | 930.2               | 929.4               | 929.4               | 929.4               | 1859.6                                       |
| Transportation of inputs                                 | 68.9               | 68.9               | 68.9                | 14.3                | 14.3                | 14.3                | 83.2                                         |
| Equipment                                                | 156.8              | 156.8              | 150.5               | -                   | -                   | -                   | 154.7                                        |
| Drying                                                   | 0.0                | 0.0                | 261.9               | 0.0                 | 0.0                 | 0.0                 | 87.3                                         |
| Labor                                                    | 63.6               | 63.6               | 63.6                | 0.0                 | 0.0                 | 0.0                 | 63.6                                         |
| Diesel fuel                                              | 2857.3             | 2857.3             | 2857.3              | 0.0                 | 0.0                 | 0.0                 | 2857.3                                       |
| <b>Total energy (MJ ha<sup>-1</sup> yr<sup>-1</sup>)</b> | <b>7011.7</b>      | <b>7011.7</b>      | <b>7267.3</b>       | <b>943.7</b>        | <b>943.7</b>        | <b>943.7</b>        | <b>8040.6</b>                                |

| Greenhouse gas emissions analysis                                     |               |               |               |             |             | kg CO <sub>2</sub> e ha <sup>-1</sup> yr <sup>-1</sup> |               |
|-----------------------------------------------------------------------|---------------|---------------|---------------|-------------|-------------|--------------------------------------------------------|---------------|
| Poultry litter transport                                              | 20.3          | 20.3          | 20.3          | 0.0         | 0.0         | 0.0                                                    | 20.3          |
| Poultry litter production                                             | 111.3         | 111.3         | 111.3         | 0.0         | 0.0         | 0.0                                                    | 111.3         |
| Seed                                                                  | 42.8          | 42.8          | 42.8          | 46.5        | 46.5        | 46.5                                                   | 89.3          |
| Transportation of inputs                                              | 5.4           | 5.4           | 5.4           | 1.1         | 1.1         | 1.1                                                    | 6.5           |
| Equipment                                                             | 10.2          | 10.2          | 9.8           | 0.0         | 0.0         | 0.0                                                    | 10.1          |
| Drying                                                                | 0.0           | 0.0           | 21.0          | 0.0         | 0.0         | 0.0                                                    | 7.0           |
| Diesel fuel                                                           | 205.4         | 205.4         | 205.4         | 0.0         | 0.0         | 0.0                                                    | 205.4         |
| N <sub>2</sub> O - manure application                                 | 600.6         | 600.6         | 600.6         | 0.0         | 0.0         | 0.0                                                    | 600.6         |
| N <sub>2</sub> O - aboveground crop residues, direct                  | 13.6          | 13.6          | 11.7          | 0.0         | 0.0         | 0.0                                                    | 13.0          |
| N <sub>2</sub> O - belowground crop residues, direct                  | 33.9          | 33.9          | 28.6          | 0.0         | 0.0         | 0.0                                                    | 32.1          |
| N <sub>2</sub> O - aboveground crop residues, indirect                | 3.1           | 3.1           | 2.6           | 0.0         | 0.0         | 0.0                                                    | 2.9           |
| N <sub>2</sub> O - belowground crop residues, indirect                | 7.6           | 7.6           | 6.3           | 0.0         | 0.0         | 0.0                                                    | 7.2           |
| N <sub>2</sub> O - total from crop residue                            | 58.2          | 58.1          | 49.2          | 0.0         | 0.0         | 0.0                                                    | 55.2          |
| <b>Total GHG (kg CO<sub>2</sub>e ha<sup>-1</sup> yr<sup>-1</sup>)</b> | <b>1054.1</b> | <b>1054.1</b> | <b>1065.7</b> | <b>47.6</b> | <b>47.6</b> | <b>47.6</b>                                            | <b>1105.6</b> |

Table S9: Estimates of energy consumption and greenhouse gas emissions calculated using the Farm Energy Analysis Tool (Camargo et al., 2013) for a three-year continuous organic hard red winter wheat monoculture in central New York.

| <b>Farm inputs and outputs</b>                           |                    |                    |                     |            |            |            |                                              |
|----------------------------------------------------------|--------------------|--------------------|---------------------|------------|------------|------------|----------------------------------------------|
| <b>Crop year</b>                                         | <b>Wheat - Yr1</b> | <b>Wheat - Yr2</b> | <b>Wheat - Yr 3</b> | <b>-</b>   | <b>-</b>   | <b>-</b>   | <b>Total ha<sup>-1</sup> yr<sup>-1</sup></b> |
| Field area (ha yr <sup>-1</sup> )                        | 1.0                | 1.0                | 1.0                 | 0.0        | 0.0        | 0.0        | 1.0                                          |
| Yield (Mg ha <sup>-1</sup> )                             | 3.7                | 2.2                | 2.2                 |            |            |            | 2.7                                          |
| Residue removal after harvest (%)                        | 0.90               | 0.90               | 0.90                | 0.90       | 0.90       | 0.90       | 1.80                                         |
| Crop moisture at harvest (%)                             | 0.033              | 0.082              | 0.134               | 0.000      | 0.000      | 0.000      | 0.083                                        |
| Crop moisture at storage (%)                             | 0.135              | 0.135              | 0.135               | 0.000      | 0.000      | 0.000      | 0.135                                        |
| Poultry litter (kg DM ha <sup>-1</sup> )                 | 1800.0             | 1800.0             | 1800.0              | 0.0        | 0.0        | 0.0        | 1800.0                                       |
| Poultry litter N (kg ha <sup>-1</sup> )                  | 90.0               | 90.0               | 90.0                | 0.0        | 0.0        | 0.0        | 90.0                                         |
| Poultry litter P (kg ha <sup>-1</sup> )                  | 72.0               | 72.0               | 72.0                | 0.0        | 0.0        | 0.0        | 72.0                                         |
| Poultry litter K (kg ha <sup>-1</sup> )                  | 54.0               | 54.0               | 54.0                | 0.0        | 0.0        | 0.0        | 54.0                                         |
| Seed rate (kg ha <sup>-1</sup> )                         | 107.6              | 107.6              | 107.6               | 0.0        | 0.0        | 0.0        | 107.6                                        |
| Diesel fuel (L ha <sup>-1</sup> )                        | 62.3               | 62.3               | 62.3                | 0.0        | 0.0        | 0.0        | 62.3                                         |
| Drying (MJ yr <sup>-1</sup> )                            | 0.0                | 0.0                | 0.0                 | 0.0        | 0.0        | 0.0        | 0.0                                          |
| Labor (hr ha <sup>-1</sup> )                             | 2.1                | 2.1                | 2.1                 | 0.0        | 0.0        | 0.0        | 2.1                                          |
| Crop production (Mg WM yr <sup>-1</sup> )                | 3.7                | 2.2                | 2.2                 | 0.0        | 0.0        | 0.0        | 2.7                                          |
| Crop production (Mg DM yr <sup>-1</sup> )                | 3.2                | 1.9                | 1.9                 | 0.0        | 0.0        | 0.0        | 2.4                                          |
| Residue harvested (Mg DM yr <sup>-1</sup> )              | 5.7                | 2.8                | 3.5                 | 0.0        | 0.0        | 0.0        | 4.0                                          |
| Total crop biomass                                       | 8.9                | 4.7                | 5.4                 | 0.0        | 0.0        | 0.0        | 6.3                                          |
| <b>Energy analysis</b>                                   |                    |                    |                     |            |            |            | <b>MJ ha<sup>-1</sup> yr<sup>-1</sup></b>    |
| Poultry litter transport                                 | 237.5              | 237.5              | 237.5               | 0.0        | 0.0        | 0.0        | 237.5                                        |
| Poultry litter production                                | 2697.4             | 2697.4             | 2697.4              | 0.0        | 0.0        | 0.0        | 2697.4                                       |
| Seed                                                     | 930.2              | 930.2              | 930.2               | 0.0        | 0.0        | 0.0        | 930.2                                        |
| Transportation of inputs                                 | 68.9               | 68.9               | 68.9                | 0.0        | 0.0        | 0.0        | 68.9                                         |
| Equipment                                                | 160.7              | 155.2              | 155.2               |            |            |            | 157.0                                        |
| Drying                                                   | 0.0                | 0.0                | 0.0                 | 0.0        | 0.0        | 0.0        | 0.0                                          |
| Labor                                                    | 62.0               | 62.0               | 62.0                | 0.0        | 0.0        | 0.0        | 62.0                                         |
| Diesel fuel                                              | 2794.4             | 2794.4             | 2794.4              | 0.0        | 0.0        | 0.0        | 2794.4                                       |
| <b>Total energy (MJ ha<sup>-1</sup> yr<sup>-1</sup>)</b> | <b>6951.1</b>      | <b>6945.6</b>      | <b>6945.6</b>       | <b>0.0</b> | <b>0.0</b> | <b>0.0</b> | <b>6947.5</b>                                |

| Greenhouse gas emissions analysis                                     |               |               |               |            |            | kg CO <sub>2</sub> e ha <sup>-1</sup> yr <sup>-1</sup> |               |
|-----------------------------------------------------------------------|---------------|---------------|---------------|------------|------------|--------------------------------------------------------|---------------|
| Poultry litter transport                                              | 20.3          | 20.3          | 20.3          | 0.0        | 0.0        | 0.0                                                    | 20.3          |
| Poultry litter production                                             | 111.3         | 111.3         | 111.3         | 0.0        | 0.0        | 0.0                                                    | 111.3         |
| Seed                                                                  | 42.8          | 42.8          | 42.8          | 0.0        | 0.0        | 0.0                                                    | 42.8          |
| Transportation of inputs                                              | 5.4           | 5.4           | 5.4           | 0.0        | 0.0        | 0.0                                                    | 5.4           |
| Equipment                                                             | 10.4          | 10.1          | 10.1          | 0.0        | 0.0        | 0.0                                                    | 10.2          |
| Drying                                                                | 0.0           | 0.0           | 0.0           | 0.0        | 0.0        | 0.0                                                    | 0.0           |
| Diesel fuel                                                           | 200.8         | 200.8         | 200.8         | 0.0        | 0.0        | 0.0                                                    | 200.8         |
| N <sub>2</sub> O - manure application                                 | 600.6         | 600.6         | 600.6         | 0.0        | 0.0        | 0.0                                                    | 600.6         |
| N <sub>2</sub> O - aboveground crop residues, direct                  | 15.2          | 9.6           | 4.0           | 0.0        | 0.0        | 0.0                                                    | 9.6           |
| N <sub>2</sub> O - belowground crop residues, direct                  | 38.1          | 22.9          | 22.9          | 0.0        | 0.0        | 0.0                                                    | 28.0          |
| N <sub>2</sub> O - aboveground crop residues, indirect                | 3.4           | 2.2           | 2.2           | 0.0        | 0.0        | 0.0                                                    | 2.6           |
| N <sub>2</sub> O - belowground crop residues, indirect                | 8.6           | 5.2           | 5.1           | 0.0        | 0.0        | 0.0                                                    | 6.3           |
| N <sub>2</sub> O - total from crop residue                            | 65.3          | 39.9          | 34.2          | 0.0        | 0.0        | 0.0                                                    | 46.4          |
| <b>Total GHG (kg CO<sub>2</sub>e ha<sup>-1</sup> yr<sup>-1</sup>)</b> | <b>1057.0</b> | <b>1031.2</b> | <b>1025.5</b> | <b>0.0</b> | <b>0.0</b> | <b>0.0</b>                                             | <b>1037.9</b> |

Table S10: Estimates of energy consumption and greenhouse gas emissions calculated using the Farm Energy Analysis Tool (Camargo et al., 2013) for a three-year organic corn-soybean-spelt rotation in central New York.

| Farm inputs and outputs                              |           |        |         |        |      |      |                     |                                         |
|------------------------------------------------------|-----------|--------|---------|--------|------|------|---------------------|-----------------------------------------|
|                                                      | Crop year | Corn   | Soybean | Spelt  | -    | -    | Clover<br>(w/spelt) | Total ha <sup>-1</sup> yr <sup>-1</sup> |
| Field area (ha yr <sup>-1</sup> )                    |           | 1.0    | 1.0     | 1.0    | 1.0  | 1.0  | 1.0                 | 1.0                                     |
| Yield (Mg ha <sup>-1</sup> )                         |           | 10.8   | 2.6     | 2.5    |      |      | 4.9                 | 5.3                                     |
| Residue removal after harvest (%)                    |           | 0.00   | 0.00    | 0.00   | 0.00 | 0.00 | 0.00                | 0.00                                    |
| Crop moisture at harvest (%)                         |           | 0.000  | 0.000   | 0.000  | -    | -    | -                   | 0.000                                   |
| Crop moisture at storage (%)                         |           | 0.150  | 0.130   | 0.130  | -    | -    | -                   | 0.137                                   |
| Poultry litter (kg DM ha <sup>-1</sup> )             |           | 2000.0 | 0.0     | 1000.0 | 0.0  | 0.0  | 0.0                 | 1000.0                                  |
| Poultry litter N (kg ha <sup>-1</sup> )              |           | 100.0  | 0.0     | 50.0   | 0.0  | 0.0  | 0.0                 | 50.0                                    |
| Poultry litter P (kg ha <sup>-1</sup> )              |           | 100.0  | 0.0     | 50.0   | 0.0  | 0.0  | 0.0                 | 50.0                                    |
| Poultry litter K (kg ha <sup>-1</sup> )              |           | 60.0   | 0.0     | 30.0   | 0.0  | 0.0  | 0.0                 | 30.0                                    |
| Seed rate (kg ha <sup>-1</sup> )                     |           | 20.3   | 76.1    | 135.0  | 0.0  | 0.0  | 16.8                | 82.7                                    |
| Diesel fuel (L ha <sup>-1</sup> )                    |           | 79.0   | 71.6    | 62.1   | 0.0  | 0.0  | 0.0                 | 70.9                                    |
| Drying (MJ yr <sup>-1</sup> )                        |           | 0.0    | 0.0     | 0.0    | -    | -    | -                   | 0.0                                     |
| Labor (hr ha <sup>-1</sup> )                         |           | 2.8    | 2.6     | 1.8    | 0.0  | 0.0  | 0.0                 | 2.4                                     |
| Crop production (Mg WM yr <sup>-1</sup> )            |           | 10.8   | 2.6     | 2.5    | -    | -    | -                   | 5.3                                     |
| Crop production (Mg DM yr <sup>-1</sup> )            |           | 9.1    | 2.3     | 2.2    | -    | -    | -                   | 4.5                                     |
| Residue harvested (Mg DM yr <sup>-1</sup> )          |           | 0.0    | 0.0     | 0.0    | -    | -    | -                   | 0.0                                     |
| Total crop biomass                                   |           | 9.1    | 2.3     | 2.2    | 0.0  | 0.0  | 0.0                 | 4.5                                     |
| Energy analysis                                      |           |        |         |        |      |      |                     | MJ ha <sup>-1</sup> yr <sup>-1</sup>    |
| Poultry litter transport                             |           | 263.9  | 0.0     | 132.0  | 0.0  | 0.0  | 0.0                 | 132.0                                   |
| Poultry litter production                            |           | 3203.6 | 0.0     | 1601.8 | 0.0  | 0.0  | 0.0                 | 1601.8                                  |
| Seed                                                 |           | 918.7  | 1295.2  | 1167.1 | 0.0  | 0.0  | 697.0               | 1359.4                                  |
| Transportation of inputs                             |           | 13.0   | 48.7    | 86.4   | 0.0  | 0.0  | 10.8                | 52.9                                    |
| Equipment                                            |           | 179.7  | 175.3   | 148.3  | 0.0  | 0.0  | 0.0                 | 167.8                                   |
| Drying                                               |           | 0.0    | 0.0     | 0.0    | 0.0  | 0.0  | 0.0                 | 0.0                                     |
| Labor                                                |           | 84.1   | 76.5    | 54.4   | 0.0  | 0.0  | 0.0                 | 71.7                                    |
| Diesel fuel                                          |           | 3541.8 | 3210.9  | 2781.6 | 0.0  | 0.0  | 0.0                 | 3178.1                                  |
| Total energy (MJ ha <sup>-1</sup> yr <sup>-1</sup> ) |           | 8204.9 | 4806.7  | 5971.6 | 0.0  | 0.0  | 707.8               | 6563.7                                  |

| Greenhouse gas emissions analysis                                     |               |              |              |            |            | kg CO <sub>2</sub> e ha <sup>-1</sup> yr <sup>-1</sup> |               |
|-----------------------------------------------------------------------|---------------|--------------|--------------|------------|------------|--------------------------------------------------------|---------------|
| Poultry litter transport                                              | 22.5          | 0.0          | 11.3         | 0.0        | 0.0        | 0.0                                                    | 11.3          |
| Poultry litter production                                             | 123.7         | 0.0          | 61.8         | 0.0        | 0.0        | 0.0                                                    | 61.8          |
| Seed                                                                  | 77.2          | 68.9         | 53.8         | 0.0        | 0.0        | 34.9                                                   | 78.2          |
| Transportation of inputs                                              | 1.0           | 3.8          | 6.8          | 0.0        | 0.0        | 0.8                                                    | 4.1           |
| Equipment                                                             | 11.7          | 11.4         | 9.6          | 0.0        | 0.0        | 0.0                                                    | 10.9          |
| Drying                                                                | 0.0           | 0.0          | 0.0          | 0.0        | 0.0        | 0.0                                                    | 0.0           |
| Diesel fuel                                                           | 254.6         | 230.8        | 199.9        | 0.0        | 0.0        | 0.0                                                    | 228.4         |
| N <sub>2</sub> O - manure application                                 | 667.3         | 0.0          | 333.7        | 0.0        | 0.0        | 0.0                                                    | 333.7         |
| N <sub>2</sub> O - aboveground crop residues, direct                  | 281.7         | 130.1        | 108.2        | 0.0        | 0.0        | 0.0                                                    | 173.3         |
| N <sub>2</sub> O - belowground crop residues, direct                  | 138.2         | 41.0         | 61.3         | 0.0        | 0.0        | 0.0                                                    | 80.2          |
| N <sub>2</sub> O - aboveground crop residues, indirect                | 63.4          | 29.3         | 24.3         | 0.0        | 0.0        | 0.0                                                    | 39.0          |
| N <sub>2</sub> O - belowground crop residues, indirect                | 31.1          | 9.2          | 13.8         | 0.0        | 0.0        | 0.0                                                    | 18.0          |
| N <sub>2</sub> O - total from crop residue                            | 514.4         | 209.6        | 207.6        | 0.0        | 0.0        | 0.0                                                    | 310.5         |
| <b>Total GHG (kg CO<sub>2</sub>e ha<sup>-1</sup> yr<sup>-1</sup>)</b> | <b>1672.4</b> | <b>524.5</b> | <b>884.4</b> | <b>0.0</b> | <b>0.0</b> | <b>35.7</b>                                            | <b>1039.0</b> |

Table S11: Emergy table for a three-year organic IWG-red clover polyculture in central New York.

| <b>Inputs</b>         | <b>Unit</b>   | <b>Quantity</b> | <b>UEV<br/>(sej/g or sej/J)</b>                 | <b>Emergy Flow<br/>(sej ha<sup>-1</sup> yr<sup>-1</sup>)</b> |
|-----------------------|---------------|-----------------|-------------------------------------------------|--------------------------------------------------------------|
| IWG Seed              | g             | 1.68E+04        | 1.45E+09                                        | 8.13E+12                                                     |
| Clover Seed           | g             | 2.24E+04        | 1.45E+09                                        | 3.25E+13                                                     |
| Fertilizer            | g             | 5.38E+06        | 2.13E+08                                        | 3.82E+14                                                     |
| Labor                 | J             | 3.39E+07        | 1.24E+07                                        | 1.40E+14                                                     |
| Machinery - grain     | g             | 1.20E+04        | 1.13E+10                                        | 4.51E+13                                                     |
| Machinery - forage    | g             | 1.25E+04        | 1.13E+10                                        | 4.71E+13                                                     |
| Fuel                  | J             | 1.09E+09        | 1.10E+05                                        | 3.99E+13                                                     |
| Rain                  | J             | 1.43E+11        | 3.10E+04                                        | 1.48E+15                                                     |
| Sun                   | J             | 1.23E+14        | 1.00E+00                                        | 4.11E+13                                                     |
| Wind                  | J             | 6.04E+10        | 2.45E+03                                        | 4.93E+13                                                     |
| Soil Erosion          | J             | 6.15E+09        | 1.24E+05                                        | 2.81E+14                                                     |
| <b>Fraction</b>       | <b>Year 1</b> | <b>Year 2</b>   | <b>Year 3</b>                                   | <b>Total</b>                                                 |
| Renewable Local       | 1.57E+15      | 1.57E+15        | 1.57E+15                                        | 4.70E+15                                                     |
| Nonrenewable Local    | 6.01E+14      | 8.07E+13        | 8.07E+13                                        | 7.62E+14                                                     |
| Purchased - grain     | 6.89E+14      | 4.53E+14        | 4.21E+14                                        | 1.56E+15                                                     |
| Purchased - forage    | 7.42E+14      | 4.63E+14        | 4.31E+14                                        | 1.64E+15                                                     |
| Emergy Yield - grain  | 2.86E+15      | 2.10E+15        | 2.07E+15                                        | 7.03E+15                                                     |
| Emergy Yield - forage | 2.91E+15      | 2.11E+15        | 2.08E+15                                        | 7.10E+15                                                     |
| <b>Outputs</b>        | <b>Unit</b>   | <b>Quantity</b> | <b>Specific Emergy<br/>(sej g<sup>-1</sup>)</b> |                                                              |
| Grain Yield           | g             | 1.91E+06        | 3.67E+09                                        |                                                              |
| Forage Yield          | g             | 2.26E+07        | 3.15E+08                                        |                                                              |



Table S12: Emery table for a three-year continuous organic IWG monoculture in central New York.

| <b>Inputs</b>              | <b>Unit</b>   | <b>Quantity</b> | <b>UEV<br/>(sej/g or sej/J)</b>                | <b>Emery Flow<br/>(sej ha<sup>-1</sup> yr<sup>-1</sup>)</b> |
|----------------------------|---------------|-----------------|------------------------------------------------|-------------------------------------------------------------|
| Kernza Seed                | g             | 1.68E+04        | 1.45E+09                                       | 2.44E+13                                                    |
| Fertilizer                 | g             | 5.38E+06        | 2.13E+08                                       | 3.82E+14                                                    |
| Labor                      | J             | 3.39E+07        | 1.24E+07                                       | 1.40E+14                                                    |
| Machinery - grain          | g             | 1.20E+04        | 1.13E+10                                       | 4.51E+13                                                    |
| Machinery - forage         | g             | 1.25E+04        | 1.13E+10                                       | 4.71E+13                                                    |
| Fuel                       | J             | 1.09E+09        | 1.10E+05                                       | 3.99E+13                                                    |
| Rain                       | J             | 1.43E+11        | 3.10E+04                                       | 1.48E+15                                                    |
| Sun                        | J             | 1.23E+14        | 1.00E+00                                       | 4.11E+13                                                    |
| Wind                       | J             | 6.04E+10        | 2.45E+03                                       | 4.93E+13                                                    |
| Soil Erosion               | J             | 6.15E+09        | 1.24E+05                                       | 2.54E+14                                                    |
| <b>Fraction</b>            | <b>Year 1</b> | <b>Year 2</b>   | <b>Year 3</b>                                  | <b>Total</b>                                                |
| Renewable                  | 1.57E+15      | 1.57E+15        | 1.57E+15                                       | 4.70E+15                                                    |
| Nonrenewable Local         | 6.01E+14      | 8.07E+13        | 8.07E+13                                       | 7.62E+14                                                    |
| Purchased - grain          | 5.30E+14      | 4.21E+14        | 4.21E+14                                       | 1.37E+15                                                    |
| Purchased - forage         | 5.40E+14      | 4.31E+14        | 4.31E+14                                       | 1.40E+15                                                    |
| Total Emery Yield - grain  | 2.70E+15      | 2.07E+15        | 2.07E+15                                       | 6.84E+15                                                    |
| Total Emery Yield - forage | 2.71E+15      | 2.08E+15        | 2.08E+15                                       | 6.87E+15                                                    |
| <b>Outputs</b>             | <b>Unit</b>   | <b>Quantity</b> | <b>Specific Emery<br/>(sej g<sup>-1</sup>)</b> |                                                             |
| Grain Yield                | g             | 1.95E+06        | 3.50E+09                                       |                                                             |
| Forage Yield               | g             | 1.76E+07        | 3.90E+08                                       |                                                             |

Table S13: Emergy table for a three-year continuous organic hard red winter wheat-red clover polyculture in central New York.

| Inputs               | Unit     | Quantity | UEV<br>(sej/g or sej/J)                   | Emergy Flow<br>(sej ha <sup>-1</sup> yr <sup>-1</sup> ) |
|----------------------|----------|----------|-------------------------------------------|---------------------------------------------------------|
| Wheat Seed           | g        | 1.08E+05 | 1.45E+09                                  | 1.56E+14                                                |
| Clover Seed          | g        | 2.24E+04 | 1.45E+09                                  | 3.25E+13                                                |
| Fertilizer           | g        | 1.79E+06 | 2.13E+08                                  | 3.82E+14                                                |
| Labor                | J        | 1.61E+07 | 1.24E+07                                  | 2.00E+14                                                |
| Machinery - grain    | g        | 7.21E+03 | 1.13E+10                                  | 8.15E+13                                                |
| Machinery - forage   | g        | 7.39E+03 | 1.13E+10                                  | 8.35E+13                                                |
| Fuel                 | J        | 5.64E+08 | 1.10E+05                                  | 6.20E+13                                                |
| Rain                 | J        | 4.77E+10 | 3.10E+04                                  | 1.48E+15                                                |
| Sun                  | J        | 4.11E+13 | 1.00E+00                                  | 4.11E+13                                                |
| Wind                 | J        | 2.01E+10 | 2.45E+03                                  | 4.93E+13                                                |
| Soil Erosion         | J        | 7.57E+09 | 1.24E+05                                  | 9.39E+14                                                |
| Fraction             | Year 1   | Year 2   | Year 3                                    | Total                                                   |
| Renewable Local      | 1.57E+15 | 1.57E+15 | 1.57E+15                                  | 4.70E+15                                                |
| Nonrenewable Local   | 9.39E+14 | 9.39E+14 | 9.39E+14                                  | 2.82E+15                                                |
| Purchased - grain    | 9.14E+14 | 9.14E+14 | 9.14E+14                                  | 2.74E+15                                                |
| Purchased - straw    | 9.16E+14 | 9.16E+14 | 9.16E+14                                  | 2.75E+15                                                |
| Emergy Yield - grain | 3.42E+15 | 3.42E+15 | 3.42E+15                                  | 1.03E+16                                                |
| Emergy Yield - straw | 3.42E+15 | 3.42E+15 | 3.42E+15                                  | 1.03E+16                                                |
| Outputs              | Unit     | Quantity | Specific Emergy<br>(sej g <sup>-1</sup> ) |                                                         |
| Grain Yield          | g        | 9.41E+06 | 1.09E+09                                  |                                                         |
| Straw Yield          | g        | 1.32E+07 | 7.78E+08                                  |                                                         |

Table S14: Emergy table for a three-year continuous organic hard red winter wheat monoculture in central New York.

| <b>Inputs</b>        | <b>Unit</b>   | <b>Quantity</b> | <b>UEV<br/>(sej/g or sej/J)</b>                 | <b>Emergy Flow<br/>(sej ha<sup>-1</sup> yr<sup>-1</sup>)</b> |
|----------------------|---------------|-----------------|-------------------------------------------------|--------------------------------------------------------------|
| Wheat Seed           | g             | 1.08E+05        | 1.45E+09                                        | 1.56E+14                                                     |
| Fertilizer           | g             | 1.79E+06        | 2.13E+08                                        | 3.82E+14                                                     |
| Labor                | J             | 1.61E+07        | 1.24E+07                                        | 2.00E+14                                                     |
| Machinery - grain    | g             | 7.21E+03        | 1.13E+10                                        | 8.15E+13                                                     |
| Machinery - forage   | g             | 7.39E+03        | 1.13E+10                                        | 8.35E+13                                                     |
| Fuel                 | J             | 5.64E+08        | 1.10E+05                                        | 6.20E+13                                                     |
| Rain                 | J             | 4.77E+10        | 3.10E+04                                        | 1.48E+15                                                     |
| Sun                  | J             | 4.11E+13        | 1.00E+00                                        | 4.11E+13                                                     |
| Wind                 | J             | 2.01E+10        | 2.45E+03                                        | 4.93E+13                                                     |
| Soil Erosion         | J             | 7.57E+09        | 1.24E+05                                        | 9.39E+14                                                     |
| <b>Fraction</b>      | <b>Year 1</b> | <b>Year 2</b>   | <b>Year 3</b>                                   | <b>Total</b>                                                 |
| Renewable Local      | 1.57E+15      | 1.57E+15        | 1.57E+15                                        | 4.70E+15                                                     |
| Nonrenewable Local   | 9.39E+14      | 9.39E+14        | 9.39E+14                                        | 2.82E+15                                                     |
| Purchased - grain    | 8.82E+14      | 8.82E+14        | 8.82E+14                                        | 2.64E+15                                                     |
| Purchased - straw    | 8.84E+14      | 8.84E+14        | 8.84E+14                                        | 2.65E+15                                                     |
| Emergy Yield - grain | 3.39E+15      | 3.39E+15        | 3.39E+15                                        | 1.02E+16                                                     |
| Emergy Yield - straw | 3.39E+15      | 3.39E+15        | 3.39E+15                                        | 1.02E+16                                                     |
| <b>Outputs</b>       | <b>Unit</b>   | <b>Quantity</b> | <b>Specific Emergy<br/>(sej g<sup>-1</sup>)</b> |                                                              |
| Grain Yield          | g             | 8.19E+06        | 1.24E+09                                        |                                                              |
| Straw Yield          | g             | 1.21E+07        | 8.44E+08                                        |                                                              |

Table S15: Emergy table for a three-year organic corn-soybean-spelt rotation in central New York.

| <b>Inputs</b>        | <b>Unit</b>   | <b>Quantity</b> | <b>UEV<br/>(sej/g or sej/J)</b>                 | <b>Emergy Flow<br/>(sej ha<sup>-1</sup> yr<sup>-1</sup>)</b> |
|----------------------|---------------|-----------------|-------------------------------------------------|--------------------------------------------------------------|
| Corn seed            | g             | 2.03E+04        | 8.67E+08                                        | 1.76E+13                                                     |
| Soybean seed         | g             | 7.61E+04        | 1.82E+09                                        | 1.39E+14                                                     |
| Spelt seed           | g             | 1.35E+05        | 1.45E+09                                        | 1.96E+14                                                     |
| Clover Seed          | g             | 1.68E+04        | 1.45E+09                                        | 2.44E+13                                                     |
| Fertilizer           | g             | 3.00E+06        | 2.13E+08                                        | 6.39E+14                                                     |
| Labor                | J             | 3.19E+07        | 1.24E+07                                        | 3.96E+14                                                     |
| Machinery - grain    | g             | 2.11E+04        | 1.13E+10                                        | 2.39E+14                                                     |
| Fuel                 | J             | 1.16E+09        | 1.10E+05                                        | 1.28E+14                                                     |
| Rain                 | J             | 4.77E+10        | 3.10E+04                                        | 1.48E+15                                                     |
| Sun                  | J             | 4.11E+13        | 1.00E+00                                        | 4.11E+13                                                     |
| Wind                 | J             | 2.01E+10        | 2.45E+03                                        | 4.93E+13                                                     |
| Soil Erosion         | J             | 7.57E+09        | 1.24E+05                                        | 9.39E+14                                                     |
| <b>Fraction</b>      | <b>Year 1</b> | <b>Year 2</b>   | <b>Year 3</b>                                   | <b>Total</b>                                                 |
| Renewable Local      | 1.57E+15      | 1.57E+15        | 1.57E+15                                        | 4.70E+15                                                     |
| Nonrenewable Local   | 9.39E+14      | 9.39E+14        | 9.39E+14                                        | 2.82E+15                                                     |
| Purchased - grain    | 4.85E+14      | 6.06E+14        | 6.87E+14                                        | 1.78E+15                                                     |
| Emergy Yield - grain | 2.99E+15      | 3.11E+15        | 3.19E+15                                        | 9.30E+15                                                     |
| <b>Outputs</b>       | <b>Unit</b>   | <b>Quantity</b> | <b>Specific Emergy<br/>(sej g<sup>-1</sup>)</b> |                                                              |
| Grain Yield          | g             | 1.60E+07        | 5.82E+08                                        |                                                              |
